# Supplementary material for: Evaluation of a Conformationally Constrained Indole Carboxamide as a Potential Efflux Pump Inhibitor in Pseudomonas aeruginosa
Source: MDPI journal article supplement (doi:10.3390/antibiotics11060716), 2022-05-26
Supplement: s1 [file s1]

## Supplemental Materials

**Table S1.** *P. aeruginosa* efflux liability of antibiotics tested in this manuscript.

| Antibiotics           | MICs (µg/mL) |                                 |                                 |                           |
|-----------------------|--------------|---------------------------------|---------------------------------|---------------------------|
|                       | K767 (WT)    | K1455<br>(↑ <i>mexAB-oprM</i> ) | K2415<br>(↑ <i>mexXY-oprM</i> ) | K3698<br>(Δ <i>oprM</i> ) |
| Cefpirome             | 2            | 8                               | 8                               | 0.5                       |
| Imipenem <sup>#</sup> | 2            | 1                               | 1                               | 2                         |
| Levofloxacin          | 0.5          | 4                               | 4                               | 0.031                     |
| Cotrimoxazole         | 64           | >256                            | 64                              | 4                         |
| Doxycycline           | 32           | ≥256                            | 32                              | 1                         |
| Minocycline           | 64           | >256                            | 32                              | 1                         |
| Chloramphenicol       | 128          | >256                            | 128                             | 8                         |
| Imipenem <sup>#</sup> | 2            | 1                               | 1                               | 2                         |

\* Not a substrate of RND efflux pumps in *P. aeruginosa*.

**Table S2.** Cumulative susceptibility study of *P. aeruginosa* clinical isolates to TXA09155, levofloxacin and the combination.

| Drug                          | Cumulative Susceptibility % Strains |     |     |    |    |    |    |     |      |      |      |       | MIC<br>Range<br>(µg/ml) | MIC <sub>50</sub><br>(µg/ml) | MIC <sub>90</sub><br>(µg/ml) | % R <sup>1</sup> |
|-------------------------------|-------------------------------------|-----|-----|----|----|----|----|-----|------|------|------|-------|-------------------------|------------------------------|------------------------------|------------------|
|                               | >32                                 | 32  | 16  | 8  | 4  | 2  | 1  | 0.5 | 0.25 | 0.12 | 0.06 | ≤0.03 |                         |                              |                              |                  |
| TXA09155                      | 100                                 | 36  | 9   | 6  | 3  | 2  | 2  | -   | -    | -    | -    | -     | 1 - >32                 | >32                          | >32                          | -                |
| LVX                           | 100                                 | 98  | 93  | 86 | 78 | 68 | 58 | 47  | 14   | 2    | -    | -     | 0.03 - >32              | 1                            | 16                           | 32               |
| LVX/<br>TXA09155 <sup>2</sup> | 100                                 | 100 | 100 | 98 | 95 | 92 | 88 | 83  | 78   | 65   | 45   | 13    | 0.03 - 32               | 0.12                         | 2                            | 8                |

<sup>1</sup> Percent resistant per breakpoints (2); LVX ≤1S 2I ≥4R; <sup>2</sup> TXA09155 concentration: 6.25 µg/ml n: 209; LVX: levofloxacin.

**Table S3.** Cumulative susceptibility study of *P. aeruginosa* clinical isolates to TXA09155, levofloxacin and the combination.

| Drug                          | Cumulative Susceptibility % Strains |    |    |    |    |    |    |     |      |       |      |       | MIC Range<br>(µg/ml) | MIC <sub>50</sub><br>(µg/ml) | MIC <sub>90</sub><br>(µg/ml) | % R <sup>1</sup> |
|-------------------------------|-------------------------------------|----|----|----|----|----|----|-----|------|-------|------|-------|----------------------|------------------------------|------------------------------|------------------|
|                               | >32                                 | 32 | 16 | 8  | 4  | 2  | 1  | 0.5 | 0.25 | 0.125 | 0.06 | ≤0.03 |                      |                              |                              |                  |
| TXA09155                      | 100                                 | 13 | 9  | 7  | 7  | 6  | 2  | -   | -    | -     | -    | -     | 0.25 - >32           | >32                          | >32                          | -                |
| LVX                           | 100                                 | 95 | 89 | 84 | 83 | 78 | 69 | 60  | 27   | 4     | 1    | -     | 0.06 - >32           | 0.5                          | 32                           | 22               |
| LVX/<br>TXA09155 <sup>2</sup> | 100                                 | 98 | 94 | 92 | 89 | 88 | 84 | 81  | 78   | 70    | 54   | 18    | ≤0.03 - >32          | 0.06                         | 8                            | 12               |

<sup>1</sup> Percent resistant per breakpoints (2); LVX ≤1S 2I ≥4R; <sup>2</sup> TXA09155 concentration: 6.25 µg/ml n: 300; LVX: levofloxacin.

**Table S4.** Cumulative susceptibility percentage of *P. aeruginosa* clinical isolates to TXA09155, levofloxacin and the combination.

| Drug | Cumulative Susceptibility % Strains |    |    |    |    |    |    |   |     |      |       |      | MIC<br>Range<br>(µg/ml) | MIC <sub>50</sub><br>(µg/ml) | MIC <sub>90</sub><br>(µg/ml) | % R <sup>1</sup> |
|------|-------------------------------------|----|----|----|----|----|----|---|-----|------|-------|------|-------------------------|------------------------------|------------------------------|------------------|
|      | 128                                 | 64 | 32 | 16 | 8  | 4  | 2  | 1 | 0.5 | 0.25 | 0.125 | 0.06 |                         |                              |                              |                  |
| LVX  | 100                                 | 91 | 62 | 38 | 29 | 21 | 15 | 9 | 9   | 0    | 0     | 0    | 0.5 - 128               | 32                           | 64                           | 85               |
| LVX/ | 100                                 | 91 | 62 | 44 | 32 | 21 | 15 | 9 | 9   | 0    | 0     | 0    | 0.5 - 128               | 32                           | 64                           | 85               |

|                               |     |     |     |     |    |    |    |    |    |    |    |    |   |            |   |    |    |  |
|-------------------------------|-----|-----|-----|-----|----|----|----|----|----|----|----|----|---|------------|---|----|----|--|
| MC-04,124 <sup>2</sup>        |     |     |     |     |    |    |    |    |    |    |    |    |   |            |   |    |    |  |
| LVX/<br>TXA01182 <sup>2</sup> | 100 | 100 | 100 | 94  | 76 | 53 | 44 | 29 | 24 | 18 | 15 | 6  | 3 | 0.03 - 32  | 4 | 16 | 56 |  |
| LVX/<br>TXA09155 <sup>2</sup> | 100 | 100 | 100 | 100 | 94 | 76 | 65 | 47 | 41 | 24 | 21 | 18 | 9 | ≤0.03 - 16 | 2 | 8  | 35 |  |

<sup>1</sup> Percent resistant per breakpoints (2); LVX ≤1S 2I ≥4R; <sup>2</sup> EPI concentration: 6.25 µg/ml n: 34; LVX: levofloxacin.

**Table S5.** Levofloxacin potentiation comparison between TXA09155, TXA01182 and MC-04,124 on multidrug-resistant clinical isolates of *P. aeruginosa*.

| Strain  | Levofloxacin MIC (µg/mL), (fold difference) |                             |                            |                          | Resistance mechanisms                                                                                                                   |
|---------|---------------------------------------------|-----------------------------|----------------------------|--------------------------|-----------------------------------------------------------------------------------------------------------------------------------------|
|         | No<br>EPI                                   | + MC-04,124<br>(6.25 µg/mL) | + TXA01182<br>(6.25 µg/mL) | + TXA09155<br>(50 µg/mL) |                                                                                                                                         |
| AR-0229 | 64                                          | 64, (1)                     | 8, (8)                     | 2, (32)                  | <i>nalC-G71E, mexR-V126Q, gyrA-T83I, OXA-50, PAO</i>                                                                                    |
| AR-0230 | 64                                          | 64, (1)                     | 16, (4)                    | 8, (8)                   | <i>nalC-G71E, T83I, aac(3)-Id, aadA2, cmlA1, dfrB5, OXA-4, OXA-50, PAO, tet(G), VIM-2</i>                                               |
| AR-0231 | 64                                          | 64, (1)                     | 32, (2)                    | 16, (4)                  | <i>nalC-G71E, gyrA-T83I, aac(6')-Iic, KPC-5, OXA-2, OXA-50, PAO</i>                                                                     |
| AR-0232 | 8                                           | 8, (1)                      | 1, (8)                     | 0.5, (16)                | <i>nalC-G71E, mexR-V126Q, gyrA-T83I, aadA6, OXA-50, PAO, strA, strB, sul1, tet©</i>                                                     |
| AR-0233 | 4                                           | 4, (1)                      | 0.5, (8)                   | 0.125, (32)              | <i>nalC-G71E, mexR-V126Q, catB7, OXA-50, PAO</i>                                                                                        |
| AR-0234 | 8                                           | 8, (1)                      | 1, (8)                     | 0.5, (16)                | <i>nalC-G71E, mexR-V126Q, gyrA-T83I, aadA6, OXA-50, PAO, strA, strB, tet©</i>                                                           |
| AR-0236 | 32                                          | 16, (2)                     | 8, (4)                     | 4, (8)                   | <i>nalC-G71E, mexR-V126Q, gyrA-T83I, aadB, aph(3')-Iib, OXA-50, PAO</i>                                                                 |
| AR-0239 | 64                                          | 64, (1)                     | 8, (8)                     | 4, (16)                  | <i>nalC-G71E, mexR-V126Q, gyrA-T83I, aac(6')-Iia, aadB, aph(3')-Ic, cmlA1, dfrB5, GES-1, OXA-10, OXA-50, strA, strB, tet(G), VIM-11</i> |
| AR-0240 | 128                                         | 128, (1)                    | 16, (8)                    | 8, (16)                  | <i>nalC-G71E, mexR-V126Q, gyrA-T83I, aadA6, OXA-50, PAO, sul1, VIM-2</i>                                                                |
| AR-0241 | 64                                          | 64, (1)                     | 16, (4)                    | 8, (8)                   | <i>nalC-G71E, mexR-V126Q, gyrA-T83I, aac(6')-Iic, aadA7, catB7, IMP-1, OXA-101, OXA-50, OXA-9, PAO, sul1</i>                            |
| AR-0242 | 16                                          | 8, (2)                      | 2, (8)                     | 1, (16)                  | <i>nalC-G71E, gyrA-T83I, aac(3)-Id, aadA2, cmlA1, dfrB5, OXA-4, OXA-50, PAO, VIM-2</i>                                                  |
| AR-0244 | 128                                         | 128, (1)                    | 8, (16)                    | 2, (64)                  | <i>nalC-G71E, mexR-V126Q, gyrA-T133H, OXA-50</i>                                                                                        |
| AR-0245 | 128                                         | 128, (1)                    | 32, (4)                    | 16, (8)                  | <i>nalC-G71E, mexR-V126Q, gyrA-T83I, aph(3'), OXA, PAO, sul1, VIM-2</i>                                                                 |
| AR-0246 | 64                                          | 64, (1)                     | 16, (4)                    | 8, (8)                   | <i>nalC-G71E, mexR-V126Q, gyrA-T83I, aadB, NDM-1, OXA-10, OXA-50, PAO, rmtD2, tet(G), VEB-1</i>                                         |
| AR-0247 | 2                                           | 2, (1)                      | 0.031, (64)                | ≤0.008, (256)            | <i>nalC-G71E, mexR-V126Q, gyrA-T83I, OXA-50, PAO</i>                                                                                    |
| AR-0248 | 16                                          | 16, (1)                     | 2, (8)                     | 0.5, (32)                | <i>nalC-G71E, gyrA-T83I, aac(3)-Id, aadA2, cmlA1, dfrB5, OXA-4, OXA-50, PAO, tet(G), VIM-2</i>                                          |
| AR-0249 | 64                                          | 64, (1)                     | 8, (8)                     | 2, (32)                  | <i>nalC-G71E, gyrA-T83I, aac(3)-Id, aadA2, cmlA1, dfrB5, OXA-4, OXA-50, PAO, tet(G), VIM-2</i>                                          |
| AR-0250 | 64                                          | 64, (1)                     | 16, (4)                    | 8, (8)                   | <i>nalC-G71E, mexR-V126Q, gyrA-T83I, aadB, NDM-1, OXA-10, OXA-50, PAO, rmtD2, tet(G), VEB-1</i>                                         |
| AR-0252 | 32                                          | 32, (1)                     | 2, (16)                    | 0.5, (64)                | <i>nalC-G71E, mexR-V126Q, gyrA-T83I, aadA1, aadA6, OXA-2, OXA-50, PAO, sul1</i>                                                         |
| AR-0253 | 2                                           | 2, (1)                      | 0.125, (16)                | 0.031, (64)              | <i>nalC-G71E, mexR-V126Q, gyrA-T83I, catB7, OXA-50, PAO</i>                                                                             |

|         |     |          |            |             |                                                             |
|---------|-----|----------|------------|-------------|-------------------------------------------------------------|
| AR-0256 | 0.5 | 0.5, (1) | 0.062, (8) | 0.031, (16) | <i>nalC-G71E, catB7, OXA-50, PAO</i>                        |
| AR-0258 | 0.5 | 0.5, (1) | 0.125, (4) | 0.062, (8)  | <i>nalC-G71E, mexR-V126Q, OXA-50</i>                        |
| AR-0259 | 0.5 | 0.5, (1) | 0.125, (1) | 0.062, (8)  | <i>nalC-G71E, catB7, OXA-50, PAO</i>                        |
| AR-0260 | 64  | 64, (1)  | 16, (4)    | 8, (8)      | <i>nalC-G71E, gyrA-T83I, catB7, OXA-50, PAO</i>             |
| AR-0261 | 8   | 8, (1)   | 0.5, (16)  | 0.25, (32)  | <i>nalC-G71E, mexR-V126Q, OXA-50, PAO</i>                   |
| AR-0262 | 4   | 4, (1)   | 0.25, (16) | 0.063, (64) | <i>nalC-G71E, catB7, OXA-50, PAO</i>                        |
| AR-0264 | 32  | 32, (1)  | 4, (8)     | 1, (32)     | <i>nalC-G71E, D87Y, OXA-50, PAO</i>                         |
| AR-0265 | 64  | 64, (1)  | 8, (8)     | 4, (16)     | <i>nalC-G71E, gyrA-T83I, aadB, catB7, OXA-50, PAO</i>       |
| AR-0266 | 32  | 32, (1)  | 8, (4)     | 2, (16)     | <i>nalC-G71E, mexR-V126Q, gyrA-T83I, catB7, OXA-50, PAO</i> |
| AR-0267 | 32  | 32, (1)  | 2, (16)    | 0.5, (64)   | <i>nalC-G71E, gyrA-T83I, catB7, OXA-50, PAO</i>             |
| AR-0269 | 32  | 32, (1)  | 4, (8)     | 2, (16)     | <i>nalC-G71E, mexR-V126Q, gyrA-T83I, catB7, OXA-50, PAO</i> |
| AR-0270 | 32  | 16, (2)  | 2, (16)    | 0.5, (64)   | <i>nalC-G71E, gyrA-T83I, catB7, OXA-50, PAO</i>             |
| AR-0271 | 32  | 32, (1)  | 8, (4)     | 4, (8)      | <i>nalC-G71E, mexR-V126Q, gyrA-T83I, catB7, OXA-50, PAO</i> |
| AR-0272 | 16  | 16, (1)  | 4, (4)     | 2, (8)      | <i>nalC-G71E, mexR-V126Q, gyrA-T83I, catB7, OXA-50, PAO</i> |

The *nalC-G71E* mutation is associated with MexAB-OprM overexpression [46-48]. The *mexR-V126Q* mutation is associated with MexAB-OprM overexpression [49-50]. The *gyrA-T83I* or *gyrA-T133H* mutations lead to fluoroquinolone resistance [26, 51-52].

**Table S6.** Susceptibility of *P. aeruginosa* mutants resistant to TXA09155 or TXA09155/levofloxacin combination to various antimicrobials.

| Strain                  | MIC (μg/mL) |       |     |       |     |     |     |       |     |
|-------------------------|-------------|-------|-----|-------|-----|-----|-----|-------|-----|
|                         | TXA         | LVX   | DXC | CAZ   | TGC | PMB | AMK | MEM   | AZM |
| ATCC 27853 <sup>#</sup> | 50          | 1     | 32  | 2     | 8   | 2   | 8   | 1     | 64  |
| EPIR1S                  | 200         | 1     | 16  | 2     | 8   | 4   | 8   | 2     | 64  |
| EPIR9S                  | 100         | 1     | 16  | 2     | 8   | 2   | 2   | 1     | 64  |
| EPIR20L                 | 200         | 1     | 16  | 2     | 8   | 4   | 8   | 2     | 64  |
| EPIR43                  | ND          | 0.125 | 1   | 0.125 | 2   | 4   | 1   | 0.125 | 16  |
| EPIR24L                 | ND          | ND    | ND  | ND    | ND  | ND  | ND  | ND    | ND  |

<sup>#</sup> Parent strain; TXA, TXA09155; LVX, levofloxacin; DXC, doxycycline; CAZ, ceftazidime; TGC, tigecycline; PMB, polymyxin B; AMK, amikacin; MEM, meropenem; AZM, azithromycin; ND, not determined.
